# Supplementary material for: Hindcasting and forecasting of regional methane from coal mine emissions in the Upper Silesian Coal Basin using the online nested global regional chemistry–climate model MECO(n) (MESSy v2.53)
Source: Copernicus journal article supplement (doi:10.5194/gmd-13-1925-2020), 2020-04-16
Supplement: Supplementary file 1 [file gmd-13-1925-2020-supplement.zip]

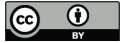

## *Supplement of*

# **Hindcasting and forecasting of regional methane from coal mine emissions in the Upper Silesian Coal Basin using the online nested global regional chemistry–climate model MECO(n) (MESSy v2.53)**

**Anna-Leah Nickl et al.**

*Correspondence to:* Anna-Leah Nickl ([anna-leah.nickl@dlr.de](mailto:anna-leah.nickl@dlr.de))

- [gmd-13-1925-2020-supplement-title-page.pdf](#)
- [Supplement.pdf](#)
- [shaft\\_position\\_emis.txt](#)

The copyright of individual parts of the supplement might differ from the CC BY 4.0 License.
