# Supplementary material for: Hindcasting and forecasting of regional methane from coal mine emissions in the Upper Silesian Coal Basin using the online nested global regional chemistry–climate model MECO(n) (MESSy v2.53)
Source: Copernicus journal article supplement (doi:10.5194/gmd-13-1925-2020), 2020-04-16
Supplement: Supplementary file 3 [file gmd-13-1925-2020-supplement.zip]

Archive with 3 entries (3 files):
- shaft_position_emis.txt
- Supplement.pdf
- gmd-13-1925-2020-supplement-title-page.pdf
