# Supplementary material for: Hindcasting and forecasting of regional methane from coal mine emissions in the Upper Silesian Coal Basin using the online nested global regional chemistry–climate model MECO(n) (MESSy v2.53)
Source: Copernicus journal article supplement (doi:10.5194/gmd-13-1925-2020), 2020-04-16
Supplement: Supplementary file 3 [file gmd-13-1925-2020-supplement.zip › shaft_position_emis.txt]

Latitude	Longitude	Name	CH4 Emission kt/a (E-PRTR, 2014)	CH4 Emission kt/a (Wyzszy Urzad Gorniczy, 2014)
49.966161°	18.686406°	Pniowek III	20.6
49.980344°	18.676136°	Pniowek IV	20.6
49.975403°	18.735367°	Pniowek V	20.6
50.001183°	18.614583°	Borynia III	5.6
49.996669°	18.648214°	Borynia VI	5.6
50.048497°	18.775675°	Krupi?ski III	25.9
49.941000°	19.012292°	Silesia I	12.15
49.952492°	19.011700°	Silesia V	12.15
49.986675°	19.154556°	Brzeszcze II		9.63
49.968997°	19.154044°	Brzeszcze IV		9.63
49.987428°	19.174750°	Brzeszcze VI		9.63
50.009631°	19.156764°	Brzeszcze IX		9.63
50.077933°	18.545153°	Chwalowice V	4.045
50.078367°	18.604811°	Chwalowice VII	4.045
50.017856°	18.508567°	Marcel Marclowice II (?)	8.85
50.034300°	18.490478°	Marcel IV (Barteczko)	8.85
50.080553°	18.416803°	Rydultowy Erbreich I (?)	12.3
50.068492°	18.394875°	Rydultowy Agnieszka V (?)	2.29
49.965836°	18.560381°	Jastrzebie IV	3.5
49.971650°	18.550528°	Jastrzebie VI	3.5
49.969244°	18.624419°	Zofiówka IV	10.05
49.968048°	18.627662°	Zofiówka V	10.05
50.030589°	18.574139°	Jankowice III	7.45
50.050392°	18.591458°	Jankowice IV	7.45
50.178050°	18.614304°	Szczyglowice IV	6.2
50.201536°	18.663340°	Szczyglowice VI	6.2
50.238182°	18.677906°	Knurow V	1.87
50.212116°	18.691876°	Knurow Aniolki	1.87
50.208343°	18.638968°	Knurow Krywald	1.87
50.172689°	18.758197°	Budryk II	14.75
50.203624°	18.803940°	Budryk V	14.75
50.162033°	18.803855°	Boleslaw Smialy Bujakow II	1.23
50.256767°	18.721939°	Sosnica V	18.9
50.253562°	18.782491°	Makoszowy Poludniowy	1.945
50.277028°	18.759794°	Makoszowy Polnocny	1.945
50.264406°	18.832578°	Bielszowice IV	9.23
50.281922°	18.824072°	Bielszowice Pawlow Gorny I	9.23
50.283439°	18.824028°	Bielszowice Pawlow Gorny II	9.23
50.248814°	18.920519°	Halemba Wschodni	3.23
50.264770°	18.875901°	Halemba Polnocny I	3.23
50.265332°	18.875189°	Halemba Polnocny II	3.23
50.249671°	18.920689°	Slask III	8.6
50.253587°	18.943166°	Slask IV	8.6
50.163544°	19.014358°	Murcki Czulow	6.9
50.200633°	18.977108°	Murcki Zygmunt	6.9
50.237417°	19.048064°	Staszic V	14.3
50.227431°	19.075717°	Wieczorek Giszowiec	5.6
50.227898°	19.096811°	Wieczorek Wschodni	5.6
50.244336°	19.079136°	Wieczorek Poniatowski	5.6
50.220281°	19.121797°	Myslowice Poludniowy	13.97
50.197508°	19.090411°	Wesola Waclaw	13.97
50.195325°	19.091004°	Wesola Wentylacyjny II	13.97
50.276742°	18.875386°	Pokoj Lech II	0.865
50.278228°	18.890328°	Pokoj Otylia	0.865
50.355675°	18.933419°	Centrum Witczak		0.03
50.353502°	18.893033°	Centrum Staszic		0.03
50.346833°	18.862772°	Bobrek Zbigniew		0.03
50.248648°	18.994121°	Wujek	7.01
